# Supplementary material for: Antimicrobial Stewardship Strategies for Implementing the 2019 EUCAST ‘I’ Definition
Source: Research Square preprint supplement (doi:10.21203/rs.3.rs-7094131/v1), 2025-08-05
Supplement: Supplementary file 1 [file 8588c4b4e0b1b50e60a39c6c.docx]

**Online Supplement to:** Antimicrobial Stewardship Strategies for Implementing the 2019 EUCAST ‘I’ Definition

Evelyne Van den Broucke1,2, Charlotte Quintens1, Willy E. Peetermans3,4,, Eric Van Wijngaerden3,4, Otto Van de gaer5,Stefanie Desmet3,5 and Isabel Spriet1,2

| **Supplementary Table 1.** Set of 13 clinical rules with details of clinical rule alert criteria, associated data source in the electronic health record (EHR), important aspects of the medication review and pharmacists’ recommendations | | | |
| --- | --- | --- | --- |
| **Clinical rule, screening for:** | **Clinical rule alert criteria*,**** | **Data source in the EHR** | **Medication review** |
| Dose Aminoglycosides (AMK/GEN/TOB) | - Exclusion if TDM is already performed - Starting/maintenance dose for GEN/TOB ≠7mg/kg q24h for eGFR ≥ 60ml/min - Starting/maintenance dose for GEN/TOB ≠5mg/kg q24h for eGFR 15- 60ml/min - Starting/maintenance dose for GEN/TOB ≠5mg/kg q48h for eGFR <15ml/min - Starting/maintenance dose for AMK ≠ 15mg/kg q24h for eGFR ≥ 15ml/min - Starting/maintenance dose for AMK ≠ 15mg/kg q48h for eGFR < 15ml/min - *** Weight is built in as alert criterium based on ‘information only’ | - Laboratory results - CPOE+ laboratory results (renal function) - CPOE+ laboratory results (renal function) - CPOE+ laboratory results (renal function) - CPOE+ laboratory results (renal function) - CPOE+ laboratory results (renal function) | - Check if AMK/GEN/TOB are administered for minimum two days - Check if dose AMK/GEN/TOB is already based on TDM - Check if GEN is given for endocarditis treatment, other dose (3mg/kg q24h for eGFR >15ml/min and 3mg/kg q48h for eGFR <15ml/min)   *> recommend correct GEN dose for endocarditis treatment*   - Check if AMK/GEN/TOB dose is correct according to eGFR   *> recommend correct dose based on eGFR* |
| Dose FLOXA PO | - FLOXA dose ≠ 1g q6h for PO administration | - CPOE | - Check if indication for PO FLOXA is correct   *> recommend switch to IV FLOXA*   - Check if FLOXA PO dose is correct   *> recommend correct dose* |
| Dose FLC | - FLC dose ≠ 800mg q24h for eGFR ≥30ml/min when cultivation of *Candida species* I FLC - FLC dose ≠ 400mg q24h for eGFR < 30ml/min when cultivation of *Candida species* I FLC | - CPOE+ laboratory results (renal function) + laboratory results (cultivation) - CPOE+ laboratory results (renal function) + laboratory results (cultivation) | - Check if patient is being treated with FLC for *Candida* species - Check if FLC is given for prophylaxis in heamatology treatment, standard dose allowed - Check if resistance to FLC is reported   *>recommend alternative therapy due to R*   - Check if FLC high dose is correct according to eGFR   *>recommend correct high dose based on eGFR* |
| Dose LVX | - LVX R - LVX dose ≠ 500mg q12h for eGFR > 30ml/min when cultivation of species I LVX - LVX dose ≠ 500mg q12-24h for eGFR 15-30ml/min when cultivation of species I LVX - LVX dose ≠ 500mg q24h for eGFR < 15ml/min when cultivation of species I LVX - LVX dose =250mg q24h for eGFR ≥ 15ml/min 🡪 check indication - LVX dose =500mg q24h for eGFR ≥ 15ml/min 🡪 check indication - LVX dose ≠ 250mg q24h for eGFR < 15ml/min | - CPOE+ laboratory results (cultivation) - CPOE+ laboratory results (renal function) + laboratory results (cultivation) - CPOE+ laboratory results (renal function) + laboratory results (cultivation) - CPOE+ laboratory results (renal function) + laboratory results (cultivation) - CPOE - CPOE+ laboratory results (renal function) - CPOE+ laboratory results (renal function) | - Check if resistance to LVX is reported   *>recommend alternative therapy due to R*   - Check indication   *>recommend correct dose based on indication and eGFR* |
| Dose MEM | - MEM R - No prolonged infusion (<3u) when cultivation of species I MEM - Dose MEM ≠ 2g q8h for eGFR ≥ 30ml/min and cultivation of species I MEM - Dose MEM ≠ 2g q8h for eGFR ≥ 30ml/min and cultivation of *Pseudomonas species* - Dose MEM ≠ 2g q12h for eGFR 15-30ml/min and cultivation of species I MEM - Dose MEM ≠ 2g q12h for eGFR 15-30ml/min and cultivation of *Pseudomonas species* - Dose MEM ≠ 1g q12h for eGFR <15ml/min and cultivation of species I MEM - Dose MEM ≠ 1g q12h for eGFR <15ml/min and cultivation of *Pseudomonas species* - Dose MEM ≠ 1q q8h for eGFR ≥ 30ml/min - Dose MEM ≠ 1g q12h for eGFR 15-30ml/min - Dose MEM ≠ 500mg q12h for eGFR < 15ml/min - Dose MEM for pediatrics ≠ 60mg/kg/d for eGFR >30ml/min | - CPOE+ laboratory results (cultivation) - CPOE+ laboratory results (renal function) + laboratory results (cultivation) - CPOE+ laboratory results (renal function) + laboratory results (cultivation) - CPOE+ laboratory results (renal function) + laboratory results (cultivation) - CPOE+ laboratory results (renal function) + laboratory results (cultivation) - CPOE+ laboratory results (renal function) + laboratory results (cultivation) - CPOE+ laboratory results (renal function) + laboratory results (cultivation) - CPOE+ laboratory results (renal function) + laboratory results (cultivation) - CPOE+ laboratory results (renal function) - CPOE+ laboratory results (renal function) - CPOE+ laboratory results (renal function) - CPOE+ laboratory results (renal function) | - Check if resistance to MEM is reported   *>recommend alternative therapy due to R*   - Check indication   *>recommend correct dose based on indication and eGFR* |
| Dose TZP | - No prolonged infusion (<3u) when cultivation of *Pseudomonas* species - Dose TZP ≠ 4g q6h for eGFR ≥ 15ml/min - Dose TZP ≠ 4g 8h for eGFR < 15ml/min | - CPOE+ laboratory results (renal function) + laboratory results (cultivation) - CPOE+ laboratory results (renal function) - CPOE+ laboratory results (renal function) | - Check if patient is being treated with TZP for *Pseudomonas* species - Check if resistance to TZP is reported   *>recommend alternative therapy due to R*   - Check if TZP dose is correct according to eGFR and species   *> recommend correct dose* |
| Dose SXT | - Dose SXT≠ 320mg q6h for eGFR ≥ 30ml/min and cultivation of *Pneumocystis jiroveci* - Dose SXT≠ 160mg q6h for eGFR <30ml/min and cultivation of *Pneumocystis jiroveci* - Dose SXT≠ 320mg q6h for eGFR ≥ 30ml/min and cultivation of *Stenotrophomonas maltophilia* - Dose SXT≠ 160mg q6h for eGFR <30ml/min and cultivation of *Stenotrophomonas maltophilia* - Dose SXT≠ 160mg q8h for eGFR ≥ 30ml/min and cultivation of species I SXT      - Dose SXT≠ 80mg q8h for eGFR <30ml/min and cultivation of species I SXT - Dose SXT< 160mg q12h for eGFR ≥ 30ml/min - Dose SXT< 80mg q12h for eGFR <30ml/min | - CPOE+ laboratory results (renal function) + laboratory results (cultivation) - CPOE+ laboratory results (renal function) + laboratory results (cultivation) - CPOE+ laboratory results (renal function) + laboratory results (cultivation) - CPOE+ laboratory results (renal function) + laboratory results (cultivation) - CPOE+ laboratory results (renal function) + laboratory results (cultivation) - CPOE+ laboratory results (renal function) + laboratory results (cultivation) - CPOE+ laboratory results (renal function) + laboratory results (cultivation) - CPOE+ laboratory results (renal function) + laboratory results (cultivation) | - Check if SXT is given for prophylaxis - Check if patient is being treated with SXT for *Pneumocystis jiroveci* or *Stenotrophomonas maltophilia*   *> recommend correct very high dose*   - Check if patient is being treated with SXT for species I SXT or meningitis   *> recommend correct high dose*   - Check if resistance to SXT is reported   *>recommend alternative therapy due to R*   - If none of the above, check if correct standard dose is given   *> recommend correct standard dose* |
| Dose TEM | - Dose TEM ≠ 2g q8h for eGFR ≥ 30ml/min and urinary culture with cultivation of *Enterobacterales* I TEM - Dose TEM ≠ 2g q12h for eGFR 15-30ml/min and urinary culture with cultivation of *Enterobacterales* I TEM - Dose TEM ≠ 2g q24h for eGFR < 15ml/min and urinary culture with cultivation of *Enterobacterales* I TEM - Dose TEM ≠ 2g q12h for eGFR ≥ 30ml/min and urinary culture with cultivation of *Enterobacterales* S TEM - Dose TEM ≠ 2g q24h for eGFR 15-30ml/min and urinary culture with cultivation of *Enterobacterales* S TEM - Dose TEM ≠ 1g q24h for eGFR <15ml/min and urinary culture with cultivation of *Enterobacterales* S TEM - Dose TEM ≠ 2g q8h for eGFR ≥ 30ml/min and urinary culture with cultivation of *Enterobacterales* S/I TEM and haemoculture with cultivation of *Enterobacterales* - Dose TEM ≠ 2g q12h for eGFR 15-30ml/min and urinary culture with cultivation of *Enterobacterales* S/I TEM and haemoculture with cultivation of *Enterobacterales* - Dose TEM ≠ 2g q24h for eGFR <15ml/min and urinary culture with cultivation of *Enterobacterales* S/I TEM and haemoculture with cultivation of *Enterobacterales* - Dose TEM ≠ 2g q12h for eGFR >30ml/min - Dose TEM ≠ 2g q24h for eGFR 15-30ml/min - Dose TEM ≠ 1g q24h for eGFR <15ml/min - Dose TEM for pediatrics ≠ 50-100mg/kg/d | - CPOE+ laboratory results (renal function) + laboratory results (cultivation) - CPOE+ laboratory results (renal function) + laboratory results (cultivation) - CPOE+ laboratory results (renal function) + laboratory results (cultivation) - CPOE+ laboratory results (renal function) + laboratory results (cultivation) - CPOE+ laboratory results (renal function) + laboratory results (cultivation) - CPOE+ laboratory results (renal function) + laboratory results (cultivation) - CPOE+ laboratory results (renal function) + laboratory results (cultivation) - CPOE+ laboratory results (renal function) + laboratory results (cultivation) - CPOE+ laboratory results (renal function) + laboratory results (cultivation) - CPOE+ laboratory results (renal function) - CPOE+ laboratory results (renal function) - CPOE+ laboratory results (renal function) - CPOE | - Check if patient is being treated with TEM for urinary infection with *Enterobacterales* species - Check if treated *Enterobacterales* species show I TEM susceptibility   *> recommend correct high dose*   - Check if treated *Enterobacterales* species show S TEM susceptibility   *> recommend correct standard dose*   - Check if treated *Enterobacterales* species show R TEM susceptibility   *> recommend alternative therapy due to R*   - Check if patient has haemocultures with *Enterobacterales* species and is defined as a septic paient (checking doctors notes) - If patient is defined as a septic patient, check if high dose is given   *> recommend correct high dose*   - If patient is not defined as a septic patient, check if standard dose is given   *> recommend correct standard dose*   - If patient is < 18 years, check if pediatric off-label dose is given   *>Recommend correct pediatric dose* |
| Retain TEM if reported as I  (de-escalation) | - Urinary culture with cultivation of *Enterobacterales* I TEM and prescription for MEM/TZP/CAZ/FEP | - CPOE+ laboratory results (cultivation) | - Check if patient is being treated with MEM/TZP/CAZ/FEP for urinary infection with *Enterobacterales* species I TEM - Check if patient has other species cultivated for which MEM/TZP/CAZ/FEP are necessary - Are there susceptibilities reported for the urinary culture with *Enterobacterales* species for second generation cephalosporines (S/I) or LVX (S/I) - Is there a clear reason mentioned in the patient file why the patient is not treated with second generation cephalosporines or LVX or TEM (e.g. allergies)   *>Recommend de-escalation to second generation cephalosporines or LVX or TEM* |
| Retain TZP/CAZ/FEP if reported as I (de-escalation) | - Cultivation of *Pseudomonas* speciesI TZP/CAZ/FEP and prescription for MEM/CZA | - CPOE+ laboratory results (cultivation) | - Check if patient is being treated with MEM/CZA for *Pseudomonas* species I TZP/CAZ/FEP - Check if patient has other species cultivated for which MEM/CZA are necessary - Is there a clear reason mentioned in the patient file why the patient is not treated with TZP/CAZ/FEP (e.g. allergies)   *>Recommend de-escalation to TZP/CAZ/FEP* |
| Dose MEM on ICU | - Admitted to ICU ward - Cultivation of species I MEM | - Admittance reports + laboratory results (cultivation) | - Check if patient is being treated with MEM for cultivated species I MEM - Check if MEM dose is correct according to eGFR and species   *> recommend correct high dose in prolonged infusion* |
| Dose TEM and retain TEM if reported as I on ICU (de-escalation) | - Admitted to ICU ward - Urinary culture with cultivation of *Enterobacterales* I TEM | - Admittance reports + laboratory results (cultivation) | - Check if patient is being treated with TEM for urinary infection with *Enterobacterales* species I TEM - Check if TEM high dose is correct according to eGFR and I susceptibility   *> recommend correct high dose*   - Check if patient is being treated with MEM/TZP/CAZ/FEP for urinary infection with *Enterobacterales* species I TEM - Check if patient has other species cultivated for which MEM/TZP/CAZ/FEP are necessary - Are there susceptibilities reported for the urinary culture with *Enterobacterales* species for second generation cephalosporines (S/I) or LVX (S/I) - Is there a clear reason mentioned in the patient file why the patient is not treated with second generation cephalosporines or LVX or TEM (e.g. allergies)   *>Recommend de-escalation to second generation cephalosporines or LVX or TEM* |
| Dose TZP/CAZ/FEP and retain TZP/CAZ/FEP if reported as I on ICU (de-escalation) | - Admitted to ICU ward - Cultivation of *Pseudomonas* speciesI TZP/CAZ/FEP | - Admittance reports + laboratory results (cultivation) | - Check if patient is being treated with TZP/CAZ/FEP for Pseudomonas species I TZP/CAZ/FEP - Check if TZP/CAZ/FEP dose is correct according to eGFR and I susceptibility   *> recommend correct dose*   - Check if patient is being treated with MEM/CZA for Pseudomonas species I TZP/CAZ/FEP - Check if patient has other species cultivated for which MEM/CZA are necessary - Is there a clear reason mentioned in the patient file why the patient is not treated with TZP/CAZ/FEP (e.g. allergies)   *>Recommend de-escalation to TZP/CAZ/FEP* |
| *For all clinical rules, the age of ≥ 18 years was applied as alert criterium based on patient characteristics  ** Only for the clinical rules “dose MEM” and “dose TEM”, the age of < 18 years was applied as alert criterium based on patient characteristics to assess paediatric dose  **AMK** – Amikacine; **CAZ** – Ceftazidim; **CPOE** – Computerized Physician Order Entry; **CZA** – Ceftazidim; **EHR** – Electronic Health Record; **eGFR** – estimated glomerular filtration rate; **FEP** – Cefepim; **FLC** – Fluconazol; **FLOXA** – Flucloxacilline; **GEN** – Gentamicine; **ICU** – Intensive Care Unit; **LVX** – Levofloxacine; **MEM** – Meropenem; **PO** – Per orally; **q12h** – every 12 hours; **q24h** – every 24 hours; **q48h** – every 48 hours; **q6h** – every 6 hours; **R** – Resistance; **S** – Susceptible; **S/I** – Susceptible/Susceptible required increased exposure; **SXT** – Trimethoprim/sulfamethoxazol; **TEM** – Temocilline; **TDM** – Therapeutic Drug Monitoring; **TOB** – Tobramycin; **TZP** – Piperacilline/tazobactam | | | |
